# Supplementary material for: Formation of a spirodiazaselenurane and its corresponding azaselenonium derivatives from the oxidation of 2,2′-selenobis(benzamide). Structure, properties and glutathione peroxidase activity
Source: Royal Society of Chemistry journal article supplement (doi:10.1039/b710685h), 2007-01-01
Supplement: b710685h.pdf [file b710685h.pdf]

## ELECTRONIC SUPPLEMENTARY INFORMATION FOR

### **Formation of a Spirodiazaselenurane and its Corresponding Azaselenonium Derivatives from the Oxidation of 2,2'-Selenobis(benzamide). Structure, Properties and Glutathione Peroxidase Activity.**

Dušan Kuzma, Masood Parvez and Thomas G. Back\*

*Department of Chemistry, University of Calgary, Calgary, AB, Canada, T2N 1N4*

#### Contents:

|                                           |        |
|-------------------------------------------|--------|
| <sup>1</sup> H NMR Spectrum of <b>15</b>  | ESI 2  |
| <sup>13</sup> C NMR Spectrum of <b>15</b> | ESI 3  |
| <sup>1</sup> H NMR Spectrum of <b>16</b>  | ESI 4  |
| <sup>13</sup> C NMR Spectrum of <b>16</b> | ESI 5  |
| <sup>1</sup> H NMR Spectrum of <b>21</b>  | ESI 6  |
| <sup>13</sup> C NMR Spectrum of <b>21</b> | ESI 7  |
| Catalytic Activity of <b>15</b>           | ESI 8  |
| X-Ray Crystallographic Data for <b>15</b> | ESI 9  |
| X-Ray Crystallographic Data for <b>16</b> | ESI 11 |

### $^1\text{H}$ NMR Spectrum of **15** in $\text{DMSO-d}_6$

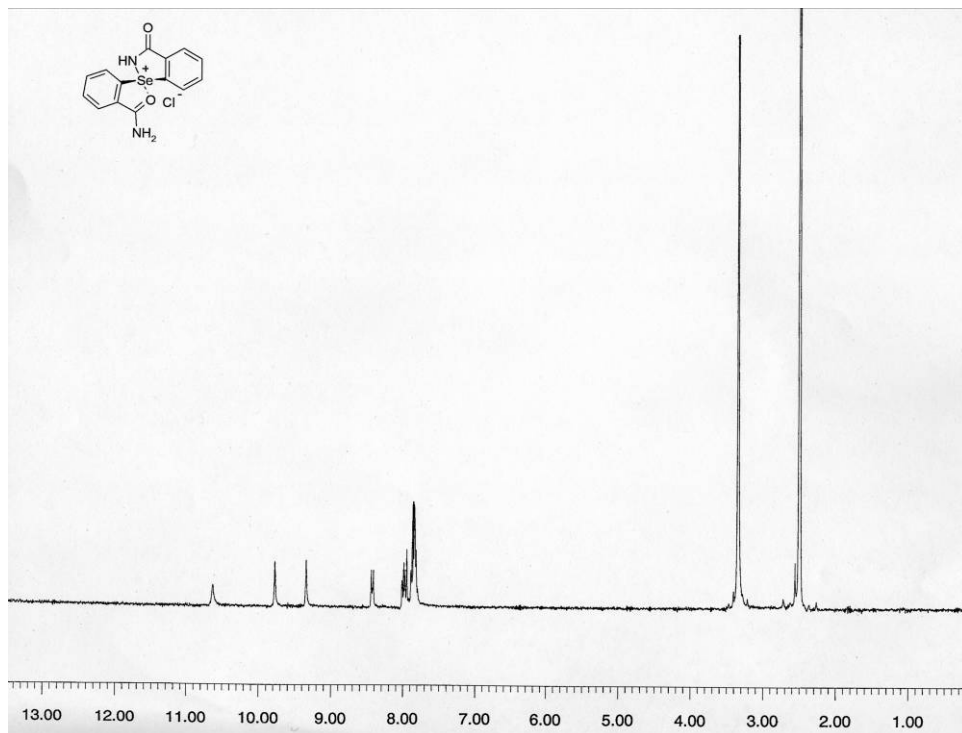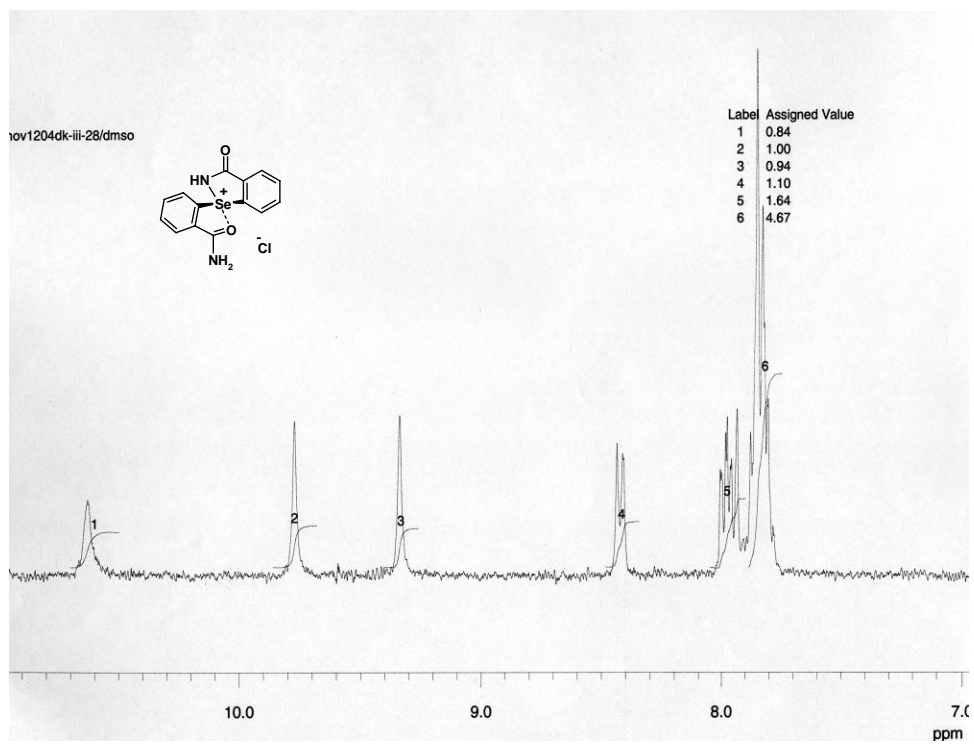

$^{13}\text{C}$  NMR Spectrum of **15** in  $\text{DMSO-d}_6$

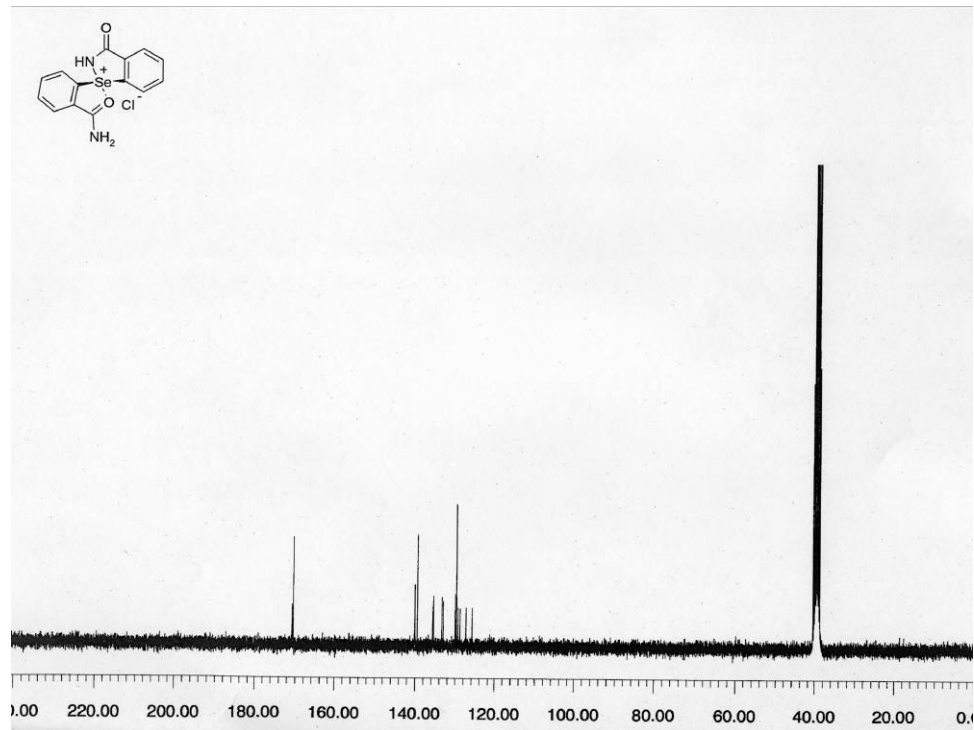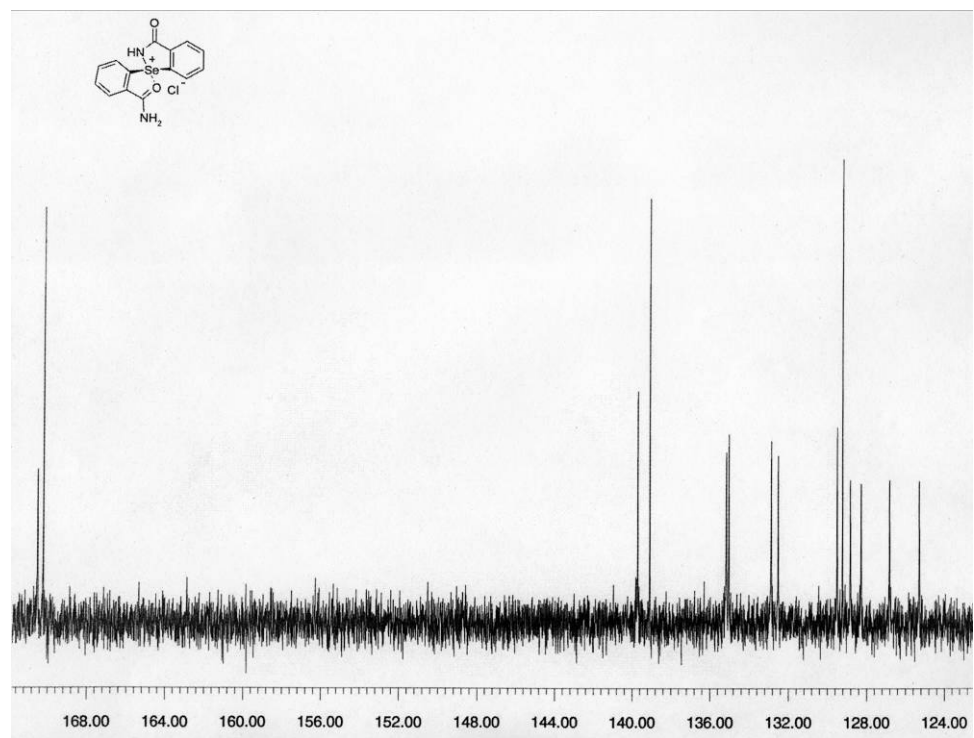

### $^1\text{H}$ NMR Spectrum of **16** in $\text{DMSO-d}_6$

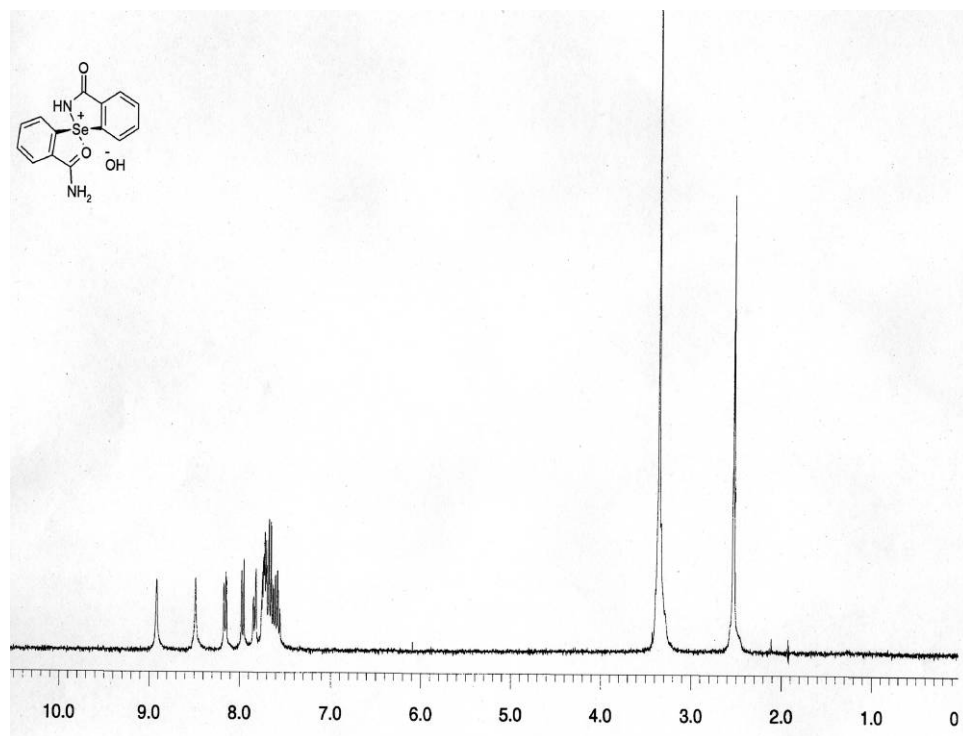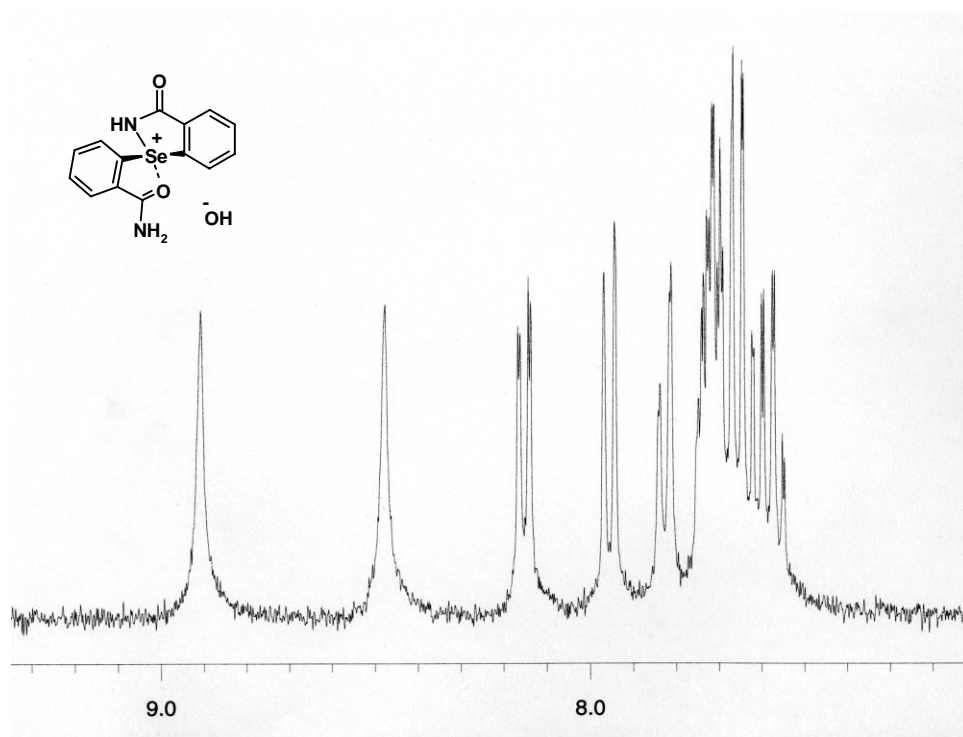

### $^{13}\text{C}$ NMR Spectrum of **16** in $\text{DMSO-d}_6$

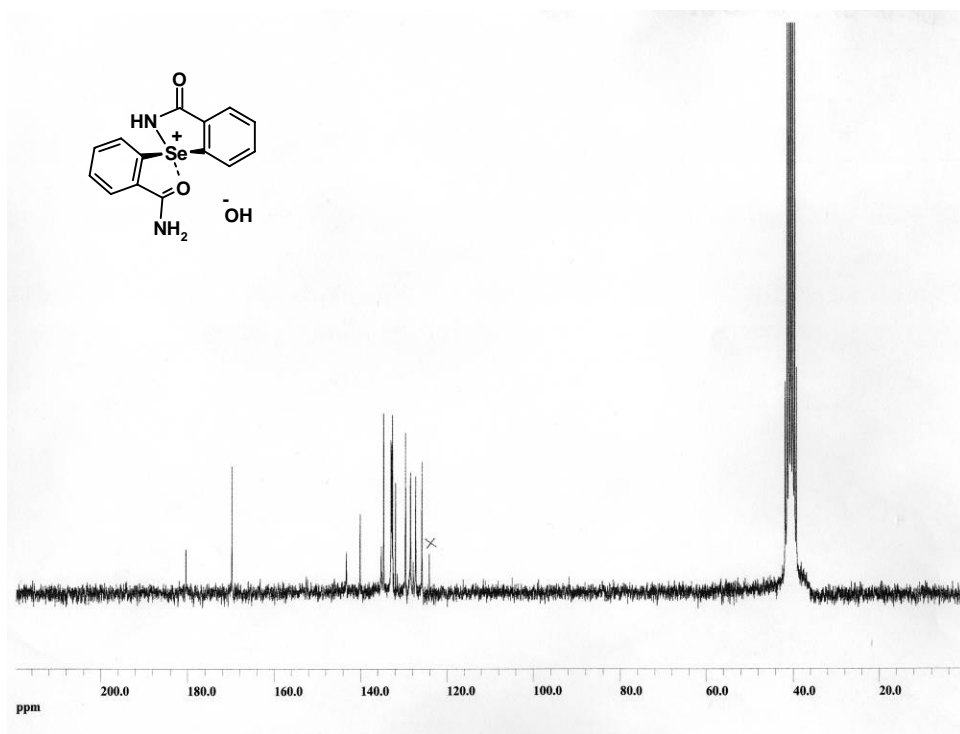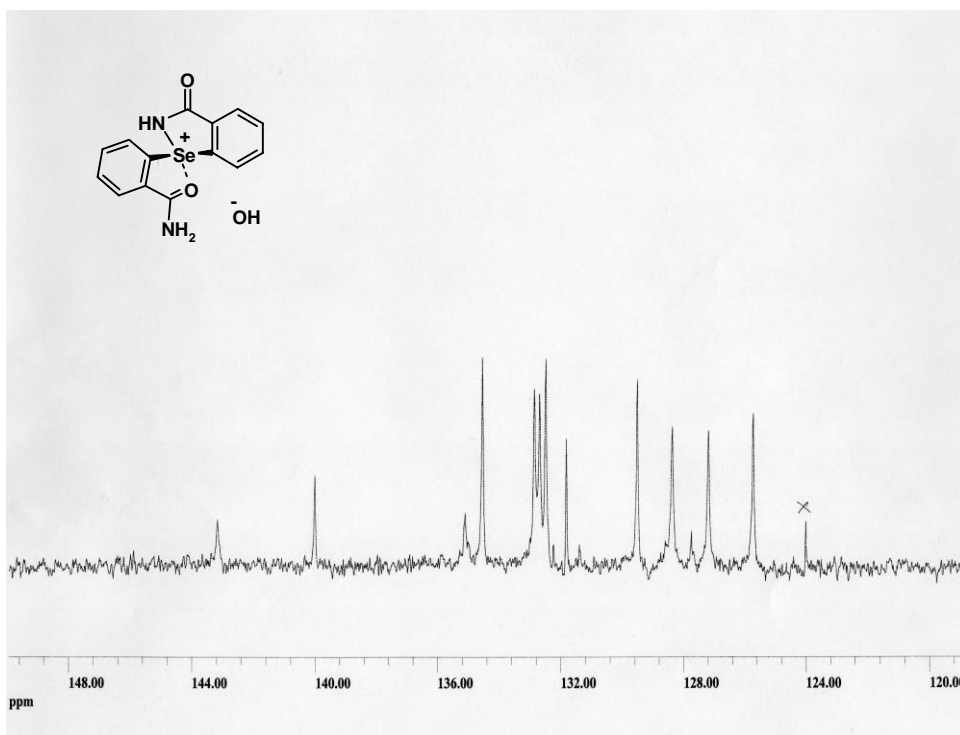

$^1\text{H}$  NMR Spectrum of **21** in  $\text{DMSO-d}_6$

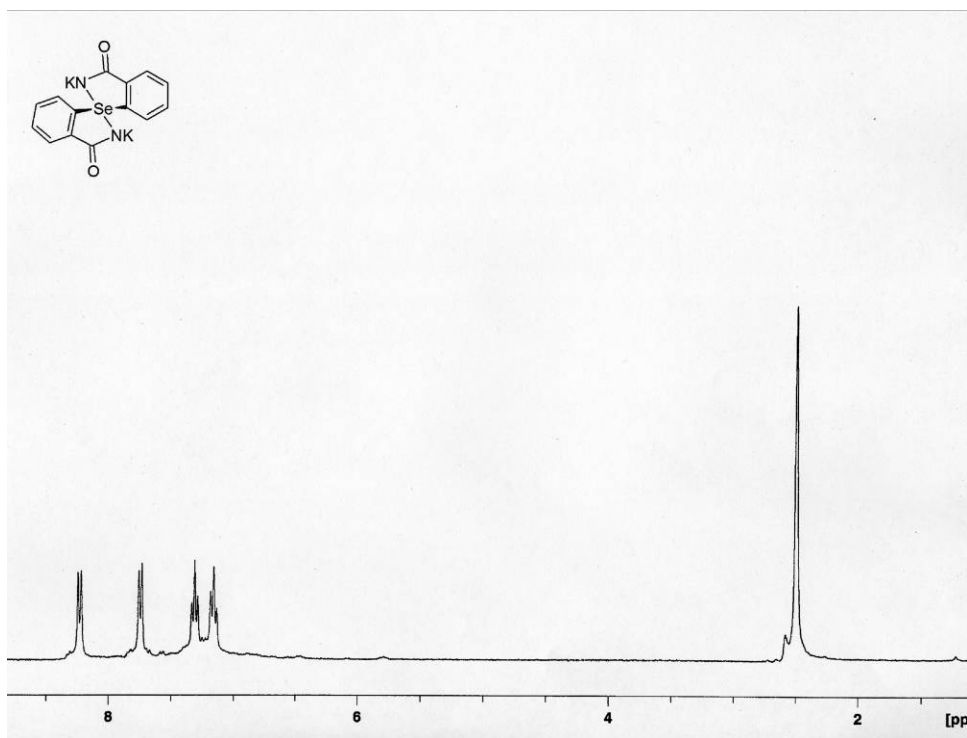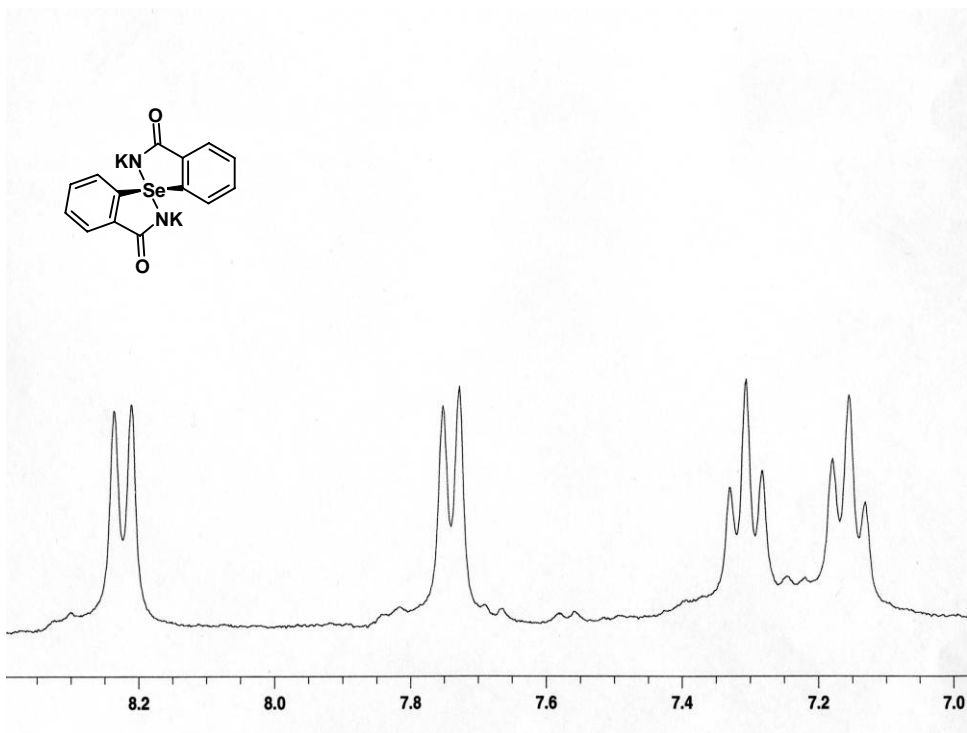

$^{13}\text{C}$  NMR Spectrum of **21** in DMSO- $d_6$

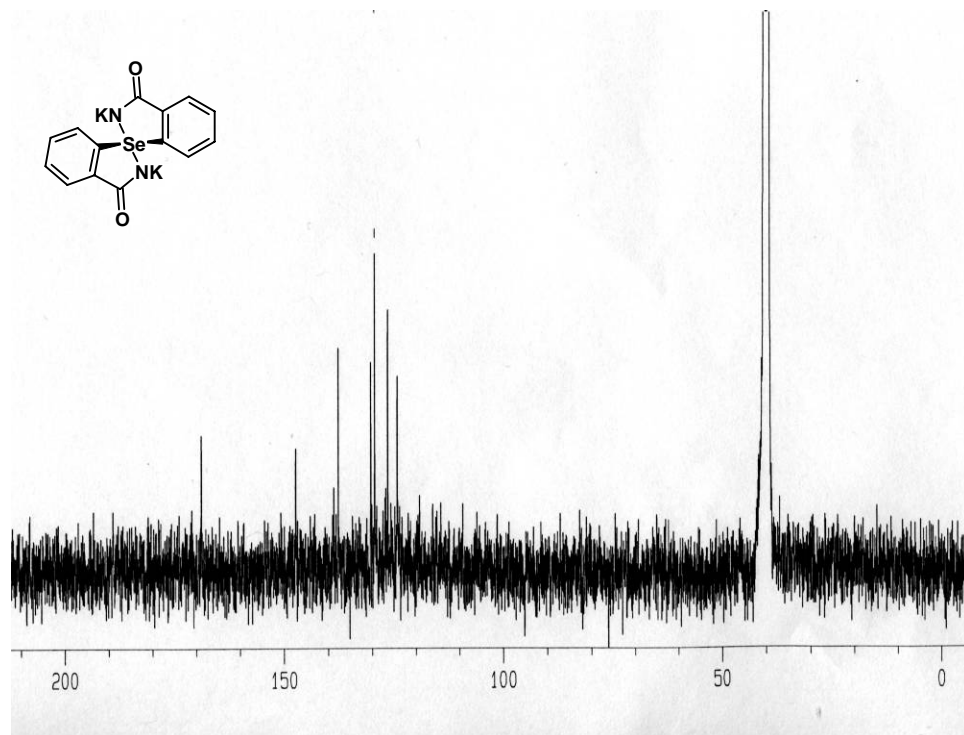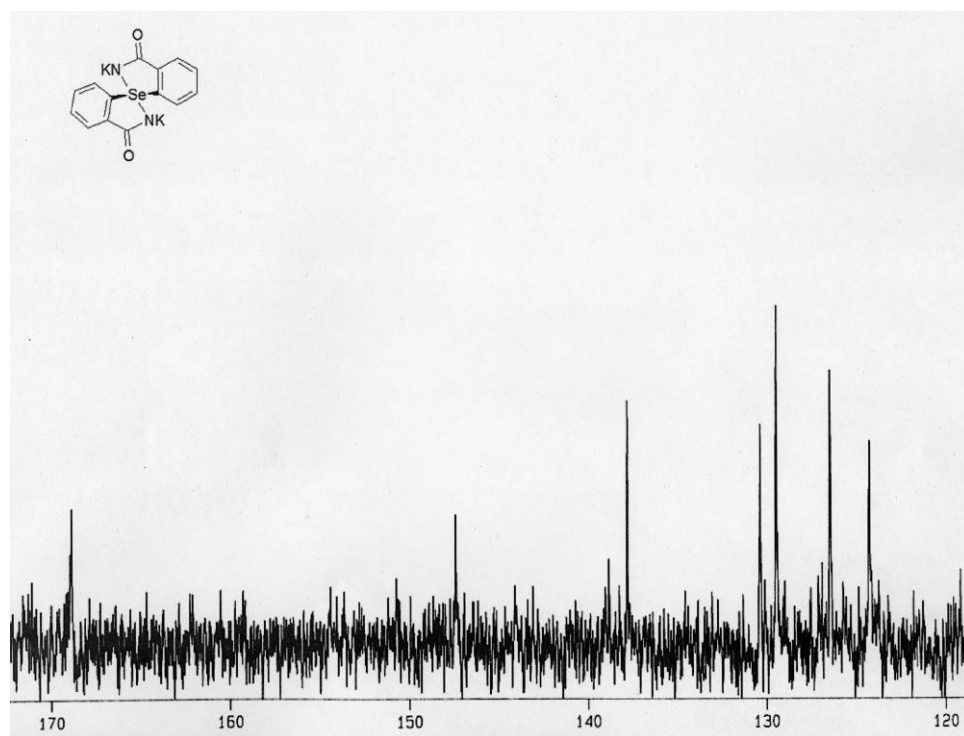

## Catalytic Activity of **15** in the Oxidation of BnSH to BnSSBn with *tert*-Butyl Hydroperoxide and Hydrogen Peroxide

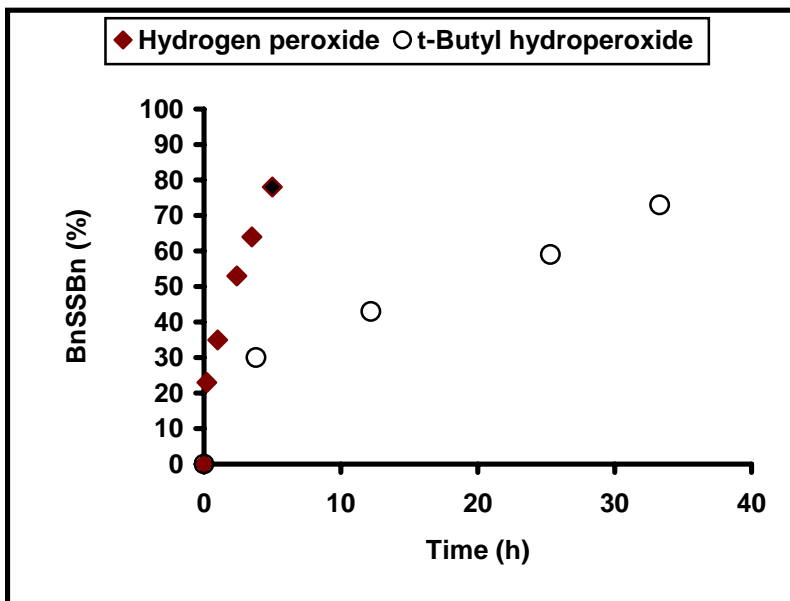

Reactions were performed with BnSH (0.031 M), **15** (0.0031 M), and either *tert*-butyl hydroperoxide (0.038 M) or H<sub>2</sub>O<sub>2</sub> (0.040 M) in CH<sub>2</sub>Cl<sub>2</sub>-MeOH (4:1) at 18 °C. Analyses were performed by HPLC on a Novapak C18 column (3.9 x 150 mm) with water-acetonitrile (20:80) as the solvent.



### X-Ray Crystallographic Data for 15

A colorless prismatic crystal of  $C_{14}H_{11}ClN_2O_2Se \cdot 0.5H_2O$  was coated with Paratone 8277 oil (Exxon) and mounted on a glass fiber. All measurements were made on a Nonius KappaCCD diffractometer with graphite monochromated Mo- $K\alpha$  radiation. The details<sup>1,2</sup> of crystal data and structure refinement have been provided in Table 1. The structure was solved by the direct methods<sup>3</sup> and expanded using Fourier techniques<sup>4</sup>. The non-hydrogen atoms were refined anisotropically. A difference map showed electron density region consistent with a disordered water molecule lying over two sites across an inversion center with 0.25 site occupancy factor each. Hydrogen atoms were located from a difference map. H-atoms bonded to C-atoms were included at geometrically idealized positions and were not refined while those bonded to N-atoms were allowed to refine; H-atoms of the disordered water of solvation were ignored. The final cycle of full-matrix least-squares refinement using SHELXL97<sup>5</sup> converged with unweighted and weighted agreement factors,  $R = 0.035$  and  $wR = 0.081$  (all data), respectively, and goodness of fit,  $S = 1.04$ . The weighting scheme was based on counting statistics and the final difference map was free of any chemically significant features. The figure was plotted with the aid of ORTEPII<sup>6</sup>.

Crystal data and structure refinement for  $C_{14}H_{11}ClN_2O_2Se \cdot 0.5H_2O$ .

|                                 |                                                                    |                              |
|---------------------------------|--------------------------------------------------------------------|------------------------------|
| Empirical formula               | $C_{14}H_{11}ClN_2O_2Se \cdot 0.5H_2O$                             |                              |
| Formula weight                  | 362.67                                                             |                              |
| Temperature                     | 173(2) K                                                           |                              |
| Wavelength                      | 0.71073 Å                                                          |                              |
| Crystal system                  | Triclinic                                                          |                              |
| Space group                     | P -1                                                               |                              |
| Unit cell dimensions            | $a = 7.944(3)$ Å                                                   | $\alpha = 81.649(3)^\circ$ . |
|                                 | $b = 9.700(4)$ Å                                                   | $\beta = 74.131(3)^\circ$ .  |
|                                 | $c = 11.001(3)$ Å                                                  | $\gamma = 67.241(2)^\circ$ . |
| Volume                          | $751.2(5)$ Å <sup>3</sup>                                          |                              |
| Z                               | 2                                                                  |                              |
| Density (calculated)            | $1.603$ Mg/m <sup>3</sup>                                          |                              |
| Absorption coefficient          | $2.68$ mm <sup>-1</sup>                                            |                              |
| F(000)                          | 362                                                                |                              |
| Crystal size                    | $0.06 \times 0.05 \times 0.04$ mm <sup>3</sup>                     |                              |
| Theta range for data collection | 3.8 to 27.4°.                                                      |                              |
| Index ranges                    | $-10 \leq h \leq 10$ , $-12 \leq k \leq 12$ , $-14 \leq l \leq 14$ |                              |
| Reflections collected           | 6428                                                               |                              |
| Independent reflections         | 3416 [R(int) = 0.032]                                              |                              |

|                                   |                                             |
|-----------------------------------|---------------------------------------------|
| Completeness to theta = 27.4°     | 99.3 %                                      |
| Absorption correction             | Multi-scan method                           |
| Max. and min. transmission        | 0.900 and 0.855                             |
| Refinement method                 | Full-matrix least-squares on F <sup>2</sup> |
| Data / restraints / parameters    | 3416 / 0 / 208                              |
| Goodness-of-fit on F <sup>2</sup> | 1.04                                        |
| Final R indices [I>2sigma(I)]     | R1 = 0.035, wR2 = 0.076                     |
| R indices (all data)              | R1 = 0.050, wR2 = 0.081                     |
| Largest diff. peak and hole       | 0.53 and -0.52 e.Å <sup>-3</sup>            |

## X-Ray Crystallographic Data for 16

A colorless prismatic crystal of  $C_{14}H_{12}N_2O_3Se \cdot 3H_2O$  was coated with Paratone 8277 oil (Exxon) and mounted on a glass fiber. All measurements were made on a Nonius KappaCCD diffractometer with graphite monochromated Mo-K $\alpha$  radiation. The details<sup>1,2</sup> of crystal data and structure refinement have been provided in Table 1. The structure was solved by the direct methods<sup>3</sup> and expanded using Fourier techniques<sup>4</sup>. The non-hydrogen atoms were refined anisotropically. Se atom was disordered with a small fraction with s.o.f. 0.046(8) lying close to the major component. H-atoms were included at geometrically idealized positions and were not refined; H-atoms of the water of solvation and OH<sup>-</sup> group were constrained. The final cycle of full-matrix least-squares refinement using SHELXL97<sup>5</sup> converged with unweighted and weighted agreement factors,  $R = 0.075$  and  $wR = 0.159$  (all data), respectively, and goodness of fit,  $S = 1.21$ . The weighting scheme was based on counting statistics and the final difference map was free of any chemically significant features. Due to the poor quality of data, an absolute structure could not be established. The figure was plotted with the aid of ORTEPII<sup>6</sup>.

Crystal data and structure refinement for  $C_{14}H_{12}N_2O_3Se \cdot 3H_2O$ .

|                                 |                                                                  |                             |
|---------------------------------|------------------------------------------------------------------|-----------------------------|
| Empirical formula               | $C_{14}H_{12}N_2O_3Se \cdot 3H_2O$                               |                             |
| Formula weight                  | 389.26                                                           |                             |
| Temperature                     | 173(2) K                                                         |                             |
| Wavelength                      | 0.71073 Å                                                        |                             |
| Crystal system                  | Monoclinic                                                       |                             |
| Space group                     | P2 <sub>1</sub>                                                  |                             |
| Unit cell dimensions            | $a = 4.554(2)$ Å                                                 | $\alpha = 90^\circ$ .       |
|                                 | $b = 18.386(4)$ Å                                                | $\beta = 102.57(2)^\circ$ . |
|                                 | $c = 9.912(7)$ Å                                                 | $\gamma = 90^\circ$ .       |
| Volume                          | 810.0(7) Å <sup>3</sup>                                          |                             |
| Z                               | 2                                                                |                             |
| Density (calculated)            | 1.596 Mg/m <sup>3</sup>                                          |                             |
| Absorption coefficient          | 2.350 mm <sup>-1</sup>                                           |                             |
| F(000)                          | 396                                                              |                             |
| Crystal size                    | 0.06 x 0.05 x 0.04 mm <sup>3</sup>                               |                             |
| Theta range for data collection | 3.9 to 25.0°.                                                    |                             |
| Index ranges                    | $-5 \leq h \leq 5$ , $-21 \leq k \leq 21$ , $-11 \leq l \leq 11$ |                             |
| Reflections collected           | 4116                                                             |                             |
| Independent reflections         | 1397 [R(int) = 0.12]                                             |                             |
| Completeness to theta = 25.0°   | 95.3 %                                                           |                             |

|                                   |                                             |
|-----------------------------------|---------------------------------------------|
| Absorption correction             | Multi-scan method                           |
| Max. and min. transmission        | 0.912 and 0.872                             |
| Refinement method                 | Full-matrix least-squares on F <sup>2</sup> |
| Data / restraints / parameters    | 1397 / 12 / 236                             |
| Goodness-of-fit on F <sup>2</sup> | 1.21                                        |
| Final R indices [I > 2σ(I)]       | R1 = 0.075, wR2 = 0.137                     |
| R indices (all data)              | R1 = 0.120, wR2 = 0.159                     |
| Largest diff. peak and hole       | 0.67 and -0.85 e.Å <sup>-3</sup>            |

### References for X-ray Structure Determinations:

1. Z. Otwinowski and W. Minor, "Processing of X-ray Diffraction Data Collected in Oscillation Mode", *Methods in Enzymology*, 1997, Volume 276: Macromolecular Crystallography, part A, p. 307-326, ed. C. W. Carter, Jr. and R. M. Sweet, Academic Press.
2. R., Hooft, *COLLECT: Users Manual*, Nonius B.V., Delft. The Netherlands, 1998.
3. A. Altomare, M. Cascarano, C. Giacovazzo and A. Guagliardi. Completion and Refinement of Crystal Structures with *SIR92*. *J. Appl. Cryst.*, 1993, **26**, 343-350.
4. P. T. Beurskens, G. Admiraal, G. Beurskens, W. P Bosman, R. de Gelder, R. Israel and J. M. M. Smits, The *DIRDIF-94* program system, Technical Report of the Crystallography Laboratory, University of Nijmegen, The Netherlands, 1994.
5. G. M. Sheldrick, *SHELXL97- A Program for Refinement of Crystal Structures*, University of Göttingen, Germany, 1997.
6. C. K. Johnson, *ORTEPII*. Report ORNL-5138. Oak Ridge National Laboratory, Tennessee, USA, 1976.
